# Supplementary material for: Clustering-Triggered Emission of EPS-605 Nanoparticles and Their Application in Biosensing
Source: MDPI journal article supplement (doi:10.3390/polym14194050), 2022-09-27
Supplement: s1 [file s1]

## *Supplementary Information*

# **Clustering-Triggered Emission of EPS-605 Nanoparticles and Their Application in Biosensing**

Chengcheng Li <sup>1</sup>, Xiaotong Shi <sup>1</sup> and Xiaodong Zhang <sup>2,\*</sup>

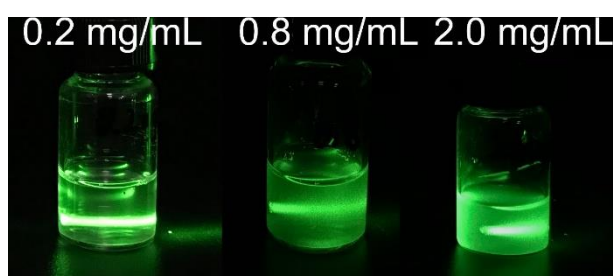

**Figure S1.** Photographs of EPS-605 aqueous solutions with different concentrations under green-emitting laser irradiation.

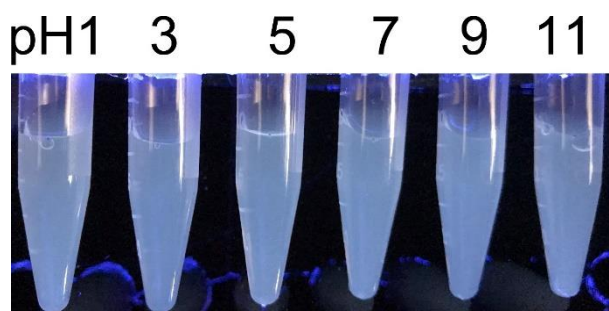

**Figure S2.** Photographs of EPS-605 solutions (0.8 mg/mL) taken under 302 nm UV light.

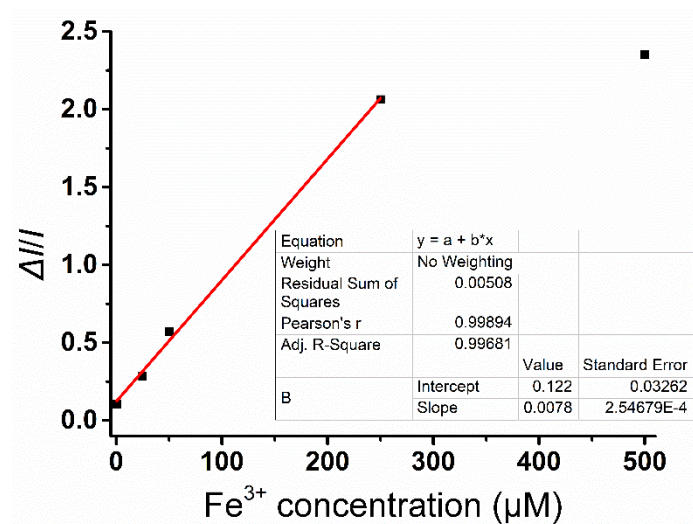

**Figure S3.** Plots of the relationship between  $\Delta I/I$  and  $\text{Fe}^{3+}$  concentration.

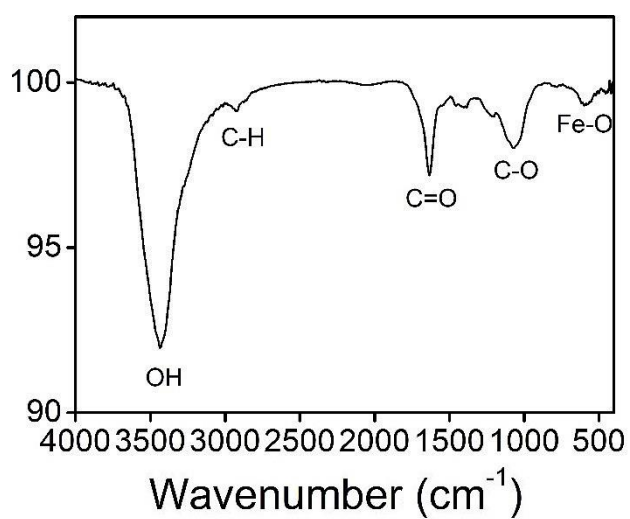

**Figure S4.** FTIR spectra of EPS-605 in the presence of  $\text{Fe}^{3+}$ .
